# Supplementary material for: Phosphorus fractionation and distribution in Nitisols of the central Ethiopian highlands affects soil nutrient management strategies in barley (Hordeum vulgare L.) production
Source: PeerJ. 2025 Dec 19;13:e20410. doi: 10.7717/peerj.20410 (PMC12721123; doi:10.7717/peerj.20410)
Supplement: Supplemental Information 1 [file peerj-13-20410-s001.xlsx]

## Sheet: Sheet1
Lab	wt	tv	aliq	readin	r-b	result mg/kg P	water soluble			Lab		B 1	B 2	B 3	B 4	B 5	B 6	Total
1722	0.5	50	15	1.4	1.2	8	B1			1722		8	0	313.333	20	66	128	535.333
1723	0.5	50	15	0.9	0.7	4.66667	soluble P bounded			1723		4.66667	0.666667	304	20	93.3333	86.6667	509.333
1724	0.5	50	15	1.45	1.25	8.33333	soluble P bounded			1724		8.33333	3	352	16	72	76	527.333
1725	0.5	50	15	1	0.8	5.33333	soluble P bounded			1725		5.33333	1	64	22.6667	100	72	265
1726	0.5	50	15	0.7	0.5	3.33333				1726		3.33333	1.66667	13.3333	56	61.3333	84	219.667
1727	0.5	50	15	0.6	0.4	2.66667				1727		2.66667	1.66667	28	70.6667	104.667	102.667	310.333
1728	0.5	50	15	0.7	0.5	3.33333				1728		3.33333	4	26.6667	192	58	120	404
1729	0.5	50	15	0.8	0.6	4				1729		4	3.33333	24	268	78.6667	76	454
1730	0.5	50	15	0.8	0.6	4				1730		4	1.33333	16	38.6667	76	108	244
b	0	50	15	0.2	0
1722	0.5	25	15	0.1	0	0	B2
1723	0.5	25	15	0.3	0.2	0.666667	Al bounded P
1724	0.5	25	15	1	0.9	3	Al bounded P
1725	0.5	25	15	0.4	0.3	1	Al bounded P
1726	0.5	25	15	0.6	0.5	1.66667	Al bounded P
1727	0.5	25	15	0.6	0.5	1.66667
1728	0.5	25	15	1.3	1.2	4
1729	0.5	25	15	1.1	1	3.33333
1730	0.5	25	15	0.5	0.4	1.33333
b	0	25	15	0.1	0		B3
1722	0.5	100	15	23.5	23.5	313.333	Fe- P
1723	0.5	100	15	22.8	22.8	304	Fe- P
1724	0.5	100	15	26.4	26.4	352	Fe- P
1725	0.5	100	15	4.8	4.8	64	Fe- P
1726	0.5	100	15	1	1	13.3333	Fe- P
1727	0.5	100	15	2.1	2.1	28	B3
1728	0.5	100	15	2	2	26.6667
1729	0.5	100	15	1.8	1.8	24
1730	0.5	100	15	1.2	1.2	16
b	0	100	15	0	0
1722	0.5	100	15	1.5	1.5	20	B4
1723	0.5	100	15	1.5	1.5	20	Reductant -P
1724	0.5	100	15	1.2	1.2	16	Reductant -P
1725	0.5	100	15	1.7	1.7	22.6667	Reductant -P
1726	0.5	100	15	4.2	4.2	56
1727	0.5	100	15	5.3	5.3	70.6667
1728	0.5	100	15	14.4	14.4	192
1729	0.5	100	15	20.1	20.1	268
1730	0.5	100	15	2.9	2.9	38.6667
b	0	100	15	0	0
1722	0.5	50	15	18.1	9.9	66	B5
1723	0.5	50	15	22.2	14	93.3333	Occluded-P
1724	0.5	50	15	19	10.8	72	Occluded-P
1725	0.5	50	15	23.2	15	100
1726	0.5	50	15	17.4	9.2	61.3333
1727	0.5	50	15	23.9	15.7	104.667
1728	0.5	50	15	16.9	8.7	58
1729	0.5	50	15	20	11.8	78.6667
1730	0.5	50	15	19.6	11.4	76
b	0	50	15	8.2	0
1722	0.5	100	15	10.9	9.6	128	B6
1723	0.5	100	15	7.8	6.5	86.6667	Ca-bounded - P
1724	0.5	100	15	7	5.7	76
1725	0.5	100	15	6.7	5.4	72
1726	0.5	100	15	7.6	6.3	84
1727	0.5	100	15	9	7.7	102.667
1728	0.5	100	15	10.3	9	120
1729	0.5	100	15	7	5.7	76
1730	0.5	100	15	9.4	8.1	108
b	0	100	15	1.3	0
