# Supplementary material for: Phosphorus fractionation and distribution in Nitisols of the central Ethiopian highlands affects soil nutrient management strategies in barley (Hordeum vulgare L.) production
Source: PeerJ. 2025 Dec 19;13:e20410. doi: 10.7717/peerj.20410 (PMC12721123; doi:10.7717/peerj.20410)
Supplement: Supplemental Information 2 [file peerj-13-20410-s002.xlsx]

## Sheet: Sheet3
P#	Zone	District	Test crop	year	TRT.	REP	LON	BMS	GY	TSW	B KG.H	G KG.H	HI
1	West Shewa	Ejere	Barley	2023	1	1	DM	3800	1657.7	46.8	7916.67	3453.54	43.6237
2	West Shewa	Ejere	Barley	2023	2	1	DM	3000	1366.6	43.6	6250	2847.08	45.5533
3	West Shewa	Ejere	Barley	2023	3	1	DM	3600	1469.3	43.2	7500	3061.04	40.8139
4	West Shewa	Ejere	Barley	2023	4	1	DM	4000	1743.1	46.4	8333.33	3631.46	43.5775
5	West Shewa	Ejere	Barley	2023	5	1	DM	2000	1177.5	46.4	4166.67	2453.12	58.875
6	West Shewa	Ejere	Barley	2023	6	1	DM	3000	1221.4	48	6250	2544.58	40.7133
7	West Shewa	Ejere	Barley	2023	7	1	DM	4000	1673.6	48.4	8333.33	3486.67	41.84
8	West Shewa	Ejere	Barley	2023	8	1	DM	3400	1461	44.4	7083.33	3043.75	42.9706
9	West Shewa	Ejere	Barley	2023	9	1	DM	3200	1475.4	47.6	6666.67	3073.75	46.1062
10	West Shewa	Ejere	Barley	2023	8	2	DM	3800	1370.3	45.6	7916.67	2854.79	36.0605
11	West Shewa	Ejere	Barley	2023	7	2	DM	3000	1297.1	46.8	6250	2702.29	43.2367
12	West Shewa	Ejere	Barley	2023	9	2	DM	2000	968.1	45.2	4166.67	2016.88	48.405
13	West Shewa	Ejere	Barley	2023	4	2	DM	4000	1874.8	48.4	8333.33	3905.83	46.87
14	West Shewa	Ejere	Barley	2023	6	2	DM	3200	1338.7	44	6666.67	2788.96	41.8344
15	West Shewa	Ejere	Barley	2023	5	2	DM	3800	1782.6	42	7916.67	3713.75	46.9105
16	West Shewa	Ejere	Barley	2023	1	2	DM	3200	1622.2	44.4	6666.67	3379.58	50.6938
17	West Shewa	Ejere	Barley	2023	3	2	DM	3800	1363	47.2	7916.67	2839.58	35.8684
18	West Shewa	Ejere	Barley	2023	2	2	DM	2000	974.9	44	4166.67	2031.04	48.745
19	West Shewa	Ejere	Barley	2023	3	3	DM	3000	1318.2	46.4	6250	2746.25	43.94
20	West Shewa	Ejere	Barley	2023	1	3	DM	3000	1338.4	46	6250	2788.33	44.6133
21	West Shewa	Ejere	Barley	2023	2	3	DM	3000	1313	46.8	6250	2735.42	43.7667
22	West Shewa	Ejere	Barley	2023	6	3	DM	2000	972.3	43.2	4166.67	2025.62	48.615
23	West Shewa	Ejere	Barley	2023	4	3	DM	3000	1649.7	45.2	6250	3436.88	54.99
24	West Shewa	Ejere	Barley	2023	5	3	DM	3400	1568.4	45.6	7083.33	3267.5	46.1294
25	West Shewa	Ejere	Barley	2023	8	3	DM	3000	1375	45.2	6250	2864.58	45.8333
26	West Shewa	Ejere	Barley	2023	9	3	DM	2600	1020.9	44.4	5416.67	2126.88	39.2654
27	West Shewa	Ejere	Barley	2023	7	3	DM	3000	1370.4	46	6250	2855	45.68
1	West Shewa	Welmera	Barley	2023	1	1	HC	5000	1718.2	36	10416.7	3579.58	34.364
2	West Shewa	Welmera	Barley	2023	2	1	HC	3800	1385.4	37.6	7916.67	2886.25	36.4579
3	West Shewa	Welmera	Barley	2023	3	1	HC	4800	1902.7	49.2	10000	3963.96	39.6396
4	West Shewa	Welmera	Barley	2023	4	1	HC	5000	1884.8	45.2	10416.7	3926.67	37.696
5	West Shewa	Welmera	Barley	2023	5	1	HC	4800	1723.7	43.6	10000	3591.04	35.9104
6	West Shewa	Welmera	Barley	2023	6	1	HC	5000	2001.6	44.4	10416.7	4170	40.032
7	West Shewa	Welmera	Barley	2023	7	1	HC	6000	2138.8	44.4	12500	4455.83	35.6467
8	West Shewa	Welmera	Barley	2023	8	1	HC	5000	1722.2	43.2	10416.7	3587.92	34.444
9	West Shewa	Welmera	Barley	2023	9	1	HC	5000	1888.1	44.4	10416.7	3933.54	37.762
10	West Shewa	Welmera	Barley	2023	8	2	HC	4800	1691.3	46	10000	3523.54	35.2354
11	West Shewa	Welmera	Barley	2023	7	2	HC	5200	1943.5	45.6	10833.3	4048.96	37.375
12	West Shewa	Welmera	Barley	2023	9	2	HC	5000	1655.9	46	10416.7	3449.79	33.118
13	West Shewa	Welmera	Barley	2023	4	2	HC	4000	1631.8	45.8	8333.33	3399.58	40.795
14	West Shewa	Welmera	Barley	2023	6	2	HC	3800	1174.5	44	7916.67	2446.88	30.9079
15	West Shewa	Welmera	Barley	2023	5	2	HC	3600	1298.9	46	7500	2706.04	36.0806
16	West Shewa	Welmera	Barley	2023	1	2	HC	5400	1893.9	42.8	11250	3945.62	35.0722
17	West Shewa	Welmera	Barley	2023	3	2	HC	4800	1543.1	39.6	10000	3214.79	32.1479
18	West Shewa	Welmera	Barley	2023	2	2	HC	4800	1697.9	42.8	10000	3537.29	35.3729
19	West Shewa	Welmera	Barley	2023	3	3	HC	5000	2039.9	43.6	10416.7	4249.79	40.798
20	West Shewa	Welmera	Barley	2023	1	3	HC	6000	2257.5	41.6	12500	4703.12	37.625
21	West Shewa	Welmera	Barley	2023	2	3	HC	3800	1544.2	43.6	7916.67	3217.08	40.6368
22	West Shewa	Welmera	Barley	2023	6	3	HC	3000	1093.9	42.8	6250	2278.96	36.4633
23	West Shewa	Welmera	Barley	2023	4	3	HC	4400	1883.2	42	9166.67	3923.33	42.8
24	West Shewa	Welmera	Barley	2023	5	3	HC	4000	1549.1	48	8333.33	3227.29	38.7275
25	West Shewa	Welmera	Barley	2023	8	3	HC	4800	1782.8	42.8	10000	3714.17	37.1417
26	West Shewa	Welmera	Barley	2023	9	3	HC	5000	1741.3	42.8	10416.7	3627.71	34.826
27	West Shewa	Welmera	Barley	2023	7	3	HC	5200	1780.8	45.2	10833.3	3710	34.2462
1	West Shewa	Welmera	Barley	2023	1	1	SD	2000	692.9	40.4	8333.33	2887.08	34.645
2	West Shewa	Welmera	Barley	2023	2	1	SD	1400	409.4	38.4	5833.33	1705.83	29.2429
3	West Shewa	Welmera	Barley	2023	3	1	SD	1400	455.9	36.4	5833.33	1899.58	32.5643
4	West Shewa	Welmera	Barley	2023	4	1	SD	2200	712.5	40.8	9166.67	2968.75	32.3864
5	West Shewa	Welmera	Barley	2023	5	1	SD	2000	682.9	41.6	8333.33	2845.42	34.145
6	West Shewa	Welmera	Barley	2023	6	1	SD	1600	622.5	42.4	6666.67	2593.75	38.9062
7	West Shewa	Welmera	Barley	2023	7	1	SD	2000	582.1	36	8333.33	2425.42	29.105
8	West Shewa	Welmera	Barley	2023	8	1	SD	2000	544.3	39.6	8333.33	2267.92	27.215
9	West Shewa	Welmera	Barley	2023	9	1	SD	1400	562	38.8	5833.33	2341.67	40.1429
10	West Shewa	Welmera	Barley	2023	8	2	SD	1400	416.9	42	5833.33	1737.08	29.7786
11	West Shewa	Welmera	Barley	2023	7	2	SD	2000	780.4	40.4	8333.33	3251.67	39.02
12	West Shewa	Welmera	Barley	2023	9	2	SD	2000	732.1	42	8333.33	3050.42	36.605
13	West Shewa	Welmera	Barley	2023	4	2	SD	2000	708	38	8333.33	2950	35.4
14	West Shewa	Welmera	Barley	2023	6	2	SD	2000	628.4	42.4	8333.33	2618.33	31.42
15	West Shewa	Welmera	Barley	2023	5	2	SD	1700	566	39.6	7083.33	2358.33	33.2941
16	West Shewa	Welmera	Barley	2023	1	2	SD	2000	616.3	36.8	8333.33	2567.92	30.815
17	West Shewa	Welmera	Barley	2023	3	2	SD	1600	282.3	36	6666.67	1176.25	17.6438
18	West Shewa	Welmera	Barley	2023	2	2	SD	1600	442.9	38.8	6666.67	1845.42	27.6813
19	West Shewa	Welmera	Barley	2023	3	3	SD	2000	501	37.2	8333.33	2087.5	25.05
20	West Shewa	Welmera	Barley	2023	1	3	SD	2000	576.3	40.4	8333.33	2401.25	28.815
21	West Shewa	Welmera	Barley	2023	2	3	SD	1200	359.5	31.2	5000	1497.92	29.9583
22	West Shewa	Welmera	Barley	2023	6	3	SD	1200	307	44.4	5000	1279.17	25.5833
23	West Shewa	Welmera	Barley	2023	4	3	SD	1400	562.1	34.4	5833.33	2342.08	40.15
24	West Shewa	Welmera	Barley	2023	5	3	SD	1600	563.6	34	6666.67	2348.33	35.225
25	West Shewa	Welmera	Barley	2023	8	3	SD	2000	607.3	45.6	8333.33	2530.42	30.365
26	West Shewa	Welmera	Barley	2023	9	3	SD	2200	657.4	46.4	9166.67	2739.17	29.8818
27	West Shewa	Welmera	Barley	2023	7	3	SD	2800	1049.4	42.4	11666.7	4372.5	37.4786
